# Supplementary material for: No clinically relevant electrocardiogram effects in a randomized TQT study of single therapeutic/supratherapeutic rimegepant doses in healthy adults
Source: PubMed Central journal article supplement — Clin Transl Sci. 2024 Mar 5;17(3):e13727. doi: 10.1111/cts.13727 (PMC10912979; doi:10.1111/cts.13727), 2024-03-05
Supplement: CTS-17-e13727-s001.pdf [file CTS-17-e13727-s001.pdf]

No clinically relevant electrocardiogram effects in a randomized TQT study of single  
therapeutic/supratherapeutic rimegepant doses in healthy adults

Rajinder Bhardwaj<sup>1</sup>, Michael S. Hanna<sup>2</sup>, Beth A. Morris<sup>2</sup>, Kyle T. Matschke<sup>3</sup>, Richard Bertz<sup>2</sup>,  
Robert S. Croop<sup>2</sup>, Jing Liu<sup>3</sup>

<sup>1</sup>Certara USA, Princeton, NJ, USA; <sup>2</sup>Biohaven Pharmaceuticals Inc, New Haven, CT, USA;

<sup>3</sup>Pfizer Inc. New York, NY, USA

**Supplementary Information**

**Table S1.** Concentration-QTc analysis of rimegepant and associated  $\Delta\Delta$ QTcF prolongation (PK/QTc population)

| <b>Parameter</b>                                                                                                                              | <b>Estimate (90% Confidence Interval)</b> | <b>P-value</b> | <b>Between-Subject Variation</b> |
|-----------------------------------------------------------------------------------------------------------------------------------------------|-------------------------------------------|----------------|----------------------------------|
| Intercept (milliseconds)                                                                                                                      | 0.43<br>(-1.22; 2.08)                     | 0.6624         | 5.57                             |
| Rimegepant slope (milliseconds per ng/mL)                                                                                                     | 0.00002<br>(-0.00022; 0.00027)            | 0.8705         | 0.06                             |
| Slope of the centered baseline QTcF (milliseconds)                                                                                            | -0.24<br>(-0.31; -0.17)                   | < 0.0001       | -                                |
| Residual variability (milliseconds)                                                                                                           | 5.38                                      | -              | -                                |
| QTc, Fridericia corrected QT; $\Delta\Delta$ QTcF, placebo-corrected change-from-baseline Fridericia corrected QT; PK, pharmacokinetics QTcF. |                                           |                |                                  |

**Figure S1.**  $\Delta\Delta\text{HR}$  across time points (QT/QTc population)

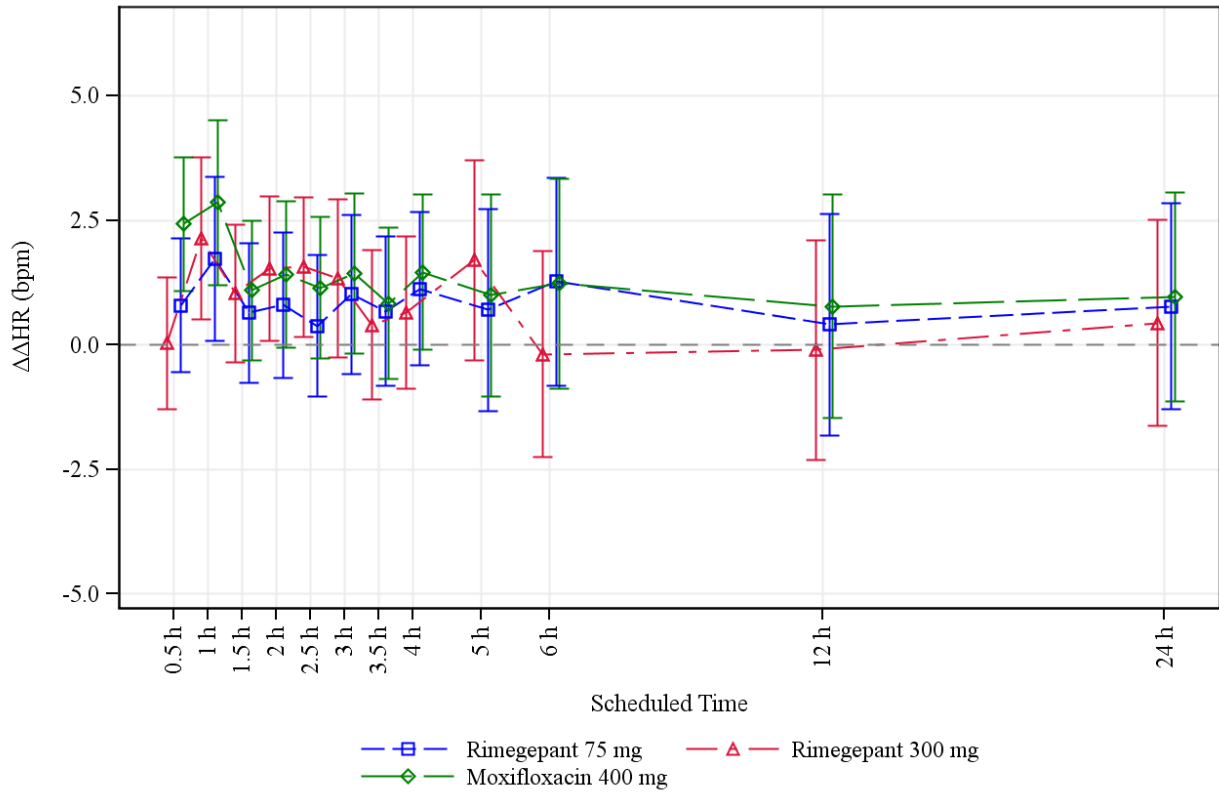

Error bars for  $\Delta\Delta\text{HR}$  are 90% CI from statistical modeling.  $\Delta\Delta\text{HR}$ , placebo-corrected change-from-baseline heart rate.

**Figure S2.** Rimegepant plasma concentration and  $\Delta\Delta\text{QTcF}$  connected in temporal order (rimegepant 75 and 300 mg) (QT/QTc population, PK/QTc population)

**A.**

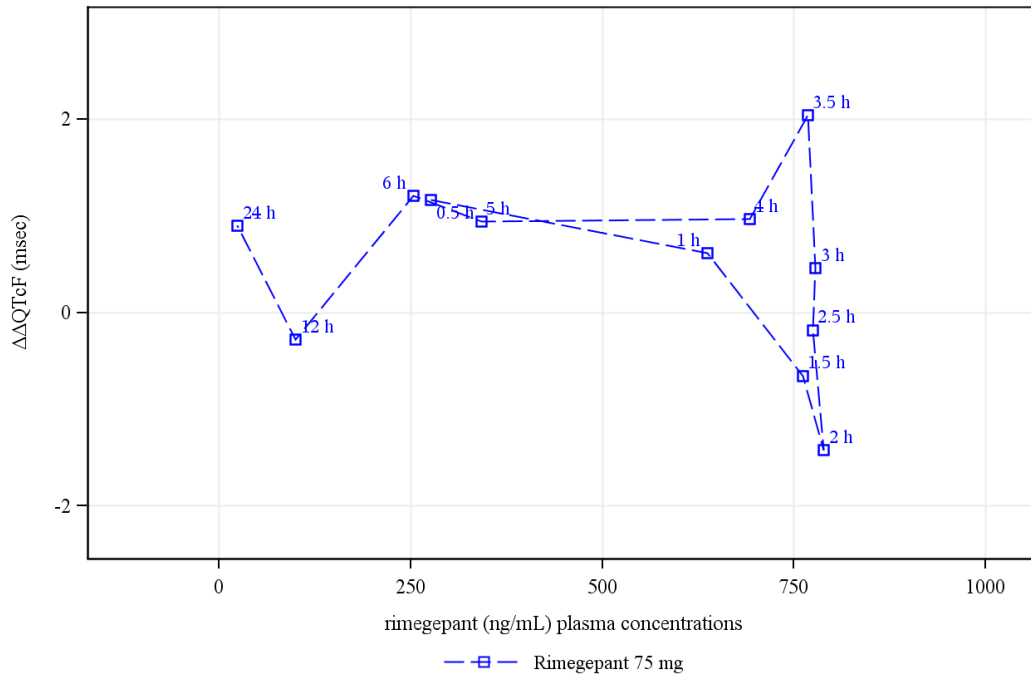

**B.**

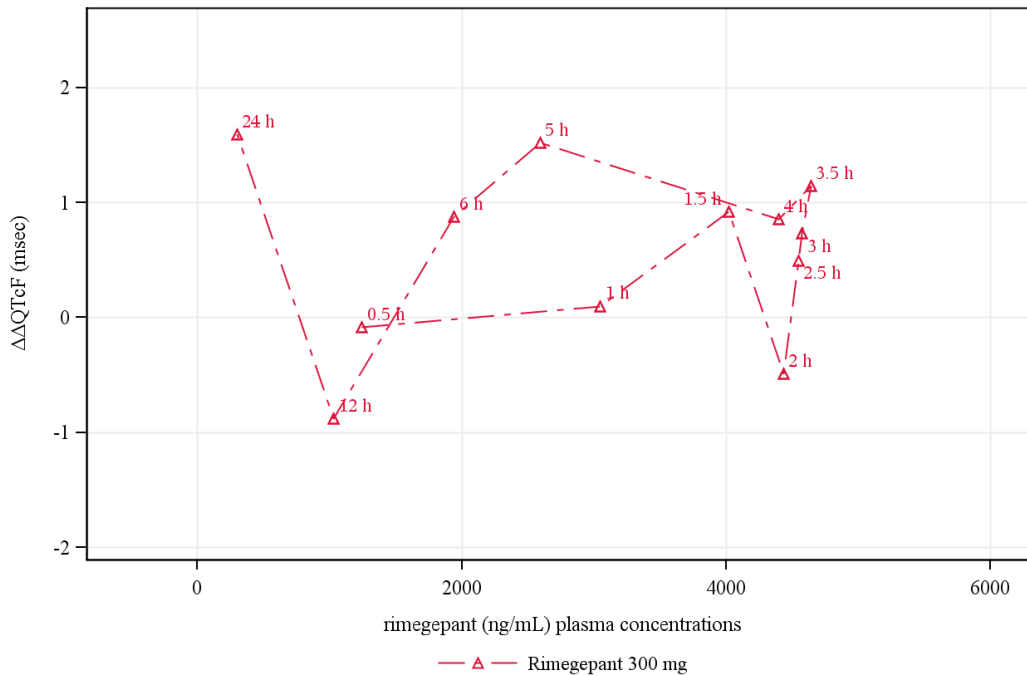

The hysteresis loops of mean rimegepant plasma concentrations and  $\Delta\Delta\text{QTcF}$  across post-dosing time points are shown for treatment with 75 mg rimegepant (A) and for treatment with 300 mg rimegepant (B). PK, pharmacokinetic;  $\Delta\Delta\text{QTcF}$ , placebo-corrected change-from-baseline Fridericia corrected QT.

**Figure S3.** Model-predicted  $\Delta\Delta\text{QTcF}$  (mean and 90% CI) and observed  $\Delta\Delta\text{QTcF}$  (mean and 90% CI) across deciles of rimegepant plasma concentrations (PK/QTc population)

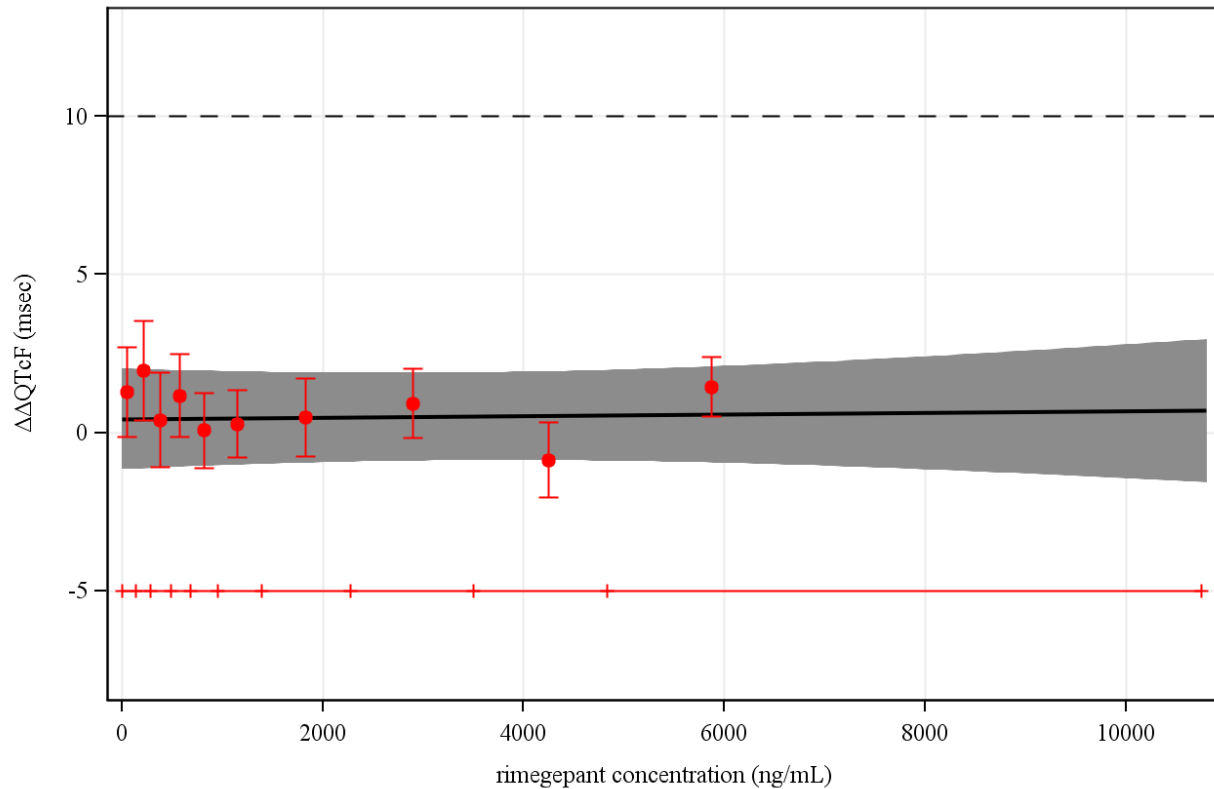

The red-filled circles with vertical bars denote the mean  $\Delta\Delta\text{QTcF}$  with 90% CI displayed at the median plasma concentration within each decile for rimegepant. The solid black line with gray-shaded area denotes the model-predicted mean  $\Delta\Delta\text{QTcF}$  with 90% CI. The horizontal red line with notches shows the range of concentrations divided into deciles for rimegepant. The area between each decile represents the point at which 10% of the data are present; the first notch to second notch denotes the first 10% of the data, the second notch to third notch denotes the 10% to 20% of the data and so on. CI, confidence interval; PK, pharmacokinetics;  $\Delta\Delta\text{QTcF}$ , placebo-corrected change-from-baseline Fridericia corrected QT.
